# Supplementary material
Source: PubMed Central journal article supplement (PMC2685446)
Supplement: neo1106_0574SD1.pdf [file neo1106_0574SD1.pdf]

**Table W1.** Fitted Rate Constants for Untreated and Etoposide-Treated Cells.

|                       | $k_L$ ( $\times 10^{-3} \text{ s}^{-1}$ ) | $k_P$ ( $\times 10^{-3} \text{ s}^{-1}$ ) | $\rho_L = \rho_P$ ( $\text{s}^{-1}$ ) |
|-----------------------|-------------------------------------------|-------------------------------------------|---------------------------------------|
| Untreated ( $n = 4$ ) | $8 \pm 1$                                 | $0.36 \pm 0.03$                           | $0.027 \pm 0.001$                     |
| 2 h ( $n = 5$ )       | $20 \pm 4$                                | $0.30 \pm 0.02$                           | $0.026 \pm 0.001$                     |
| 4 h ( $n = 6$ )       | $13 \pm 2$                                | $0.35 \pm 0.02$                           | $0.027 \pm 0.000$                     |
| 6 h ( $n = 6$ )       | $21 \pm 2^*$                              | $0.31 \pm 0.03$                           | $0.024 \pm 0.002$                     |
| 8 h ( $n = 6$ )       | $18 \pm 2$                                | $0.33 \pm 0.03$                           | $0.025 \pm 0.001$                     |
| 10 h ( $n = 5$ )      | $18 \pm 3$                                | $0.34 \pm 0.04$                           | $0.025 \pm 0.002$                     |
| 12 h ( $n = 4$ )      | $8 \pm 1$                                 | $0.30 \pm 0.03$                           | $0.023 \pm 0.002$                     |
| 14 h ( $n = 4$ )      | $7 \pm 2$                                 | $0.21 \pm 0.01^*$                         | $0.024 \pm 0.001$                     |
| 16 h ( $n = 4$ )      | $6 \pm 2$                                 | $0.06 \pm 0.01^\ddagger$                  | $0.027 \pm 0.001$                     |

Values are presented as mean  $\pm$  SEM.

\* $P < .05$ , ANOVA followed by Dunnett's *post hoc* test.

† $P < .01$ , ANOVA followed by Dunnett's *post hoc* test.

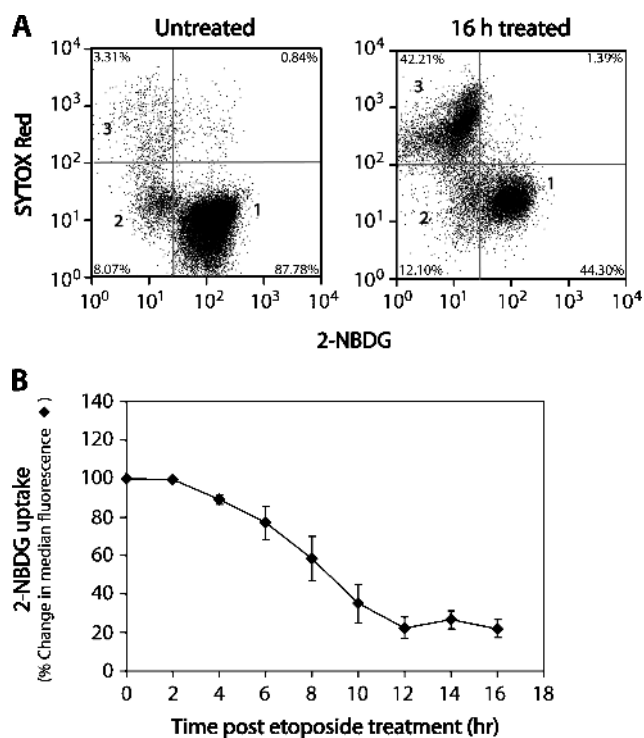

**Figure W1.** Flow cytometric analysis of 2-NBDG uptake in etoposide-treated EL-4 cells. (A) Dual-plot histogram of 2-NBDG uptake and SYTOX Red staining in 16-hour treated and untreated cells. Cells were incubated with 2-NBDG ( $100 \mu\text{M}$ ) for 60 minutes at  $37^\circ\text{C}$  before the determination of uptake by flow cytometry (2-NBDG  $\lambda\text{Ex}/\text{Em} = 465/540 \text{ nm}$ ; SYTOX Red  $\lambda\text{Ex}/\text{Em} = 640/658$ ). Population 1 represents viable cells, population 2 represents apoptotic cells, and population 3 represents necrotic cells. (B) Quantitation of 2-NBDG uptake after treatment. 2-NBDG uptake was expressed as the percentage change in median fluorescence. Mean values ( $n = 4$ ) and SEM are shown.

**Table W2.** Fitted Rate Constants for Untreated and Etoposide Treated Tumors.

|                          | $k_L$ ( $\text{s}^{-1}$ ) | $k_P$ ( $\text{s}^{-1}$ )       | $\rho_L = \rho_P$ ( $\text{s}^{-1}$ )      |
|--------------------------|---------------------------|---------------------------------|--------------------------------------------|
| Untreated ( $n = 5$ )    | $0.018 \pm 0.002$         | $0.056 \pm 0.005$               | $0.030 \pm 0.001$ ( $34 \pm 1 \text{ s}$ ) |
| Treated 16 h ( $n = 5$ ) | $0.023 \pm 0.001$         | $0.063 \pm 0.006$               | $0.031 \pm 0.001$ ( $32 \pm 1 \text{ s}$ ) |
| Treated 24 h ( $n = 6$ ) | $0.022 \pm 0.004$         | $0.034 \pm 0.006^*$ ( $-38\%$ ) | $0.032 \pm 0.001$ ( $32 \pm 2 \text{ s}$ ) |

Values are presented as mean  $\pm$  SEM.

\* $P < .05$ , ANOVA followed by Dunnett's *post hoc* test.
